# Supplementary material for: A Computational Tool to Track Sewage Flow Discharge into Rivers Based on Coupled HEC-RAS and DREAM
Source: MDPI journal article supplement (doi:10.3390/w16010051), 2023-12-22
Supplement: s1 [file s1]

Archive with 1 entries (1 files):
- water-2754428-supplementary.pdf
